# Supplementary material for: Distinct and sequential re-replication barriers ensure precise genome duplication
Source: PubMed Central journal article supplement (PMC7473519; doi:10.1371/journal.pgen.1008988), 2020-08-25

S2 Fig

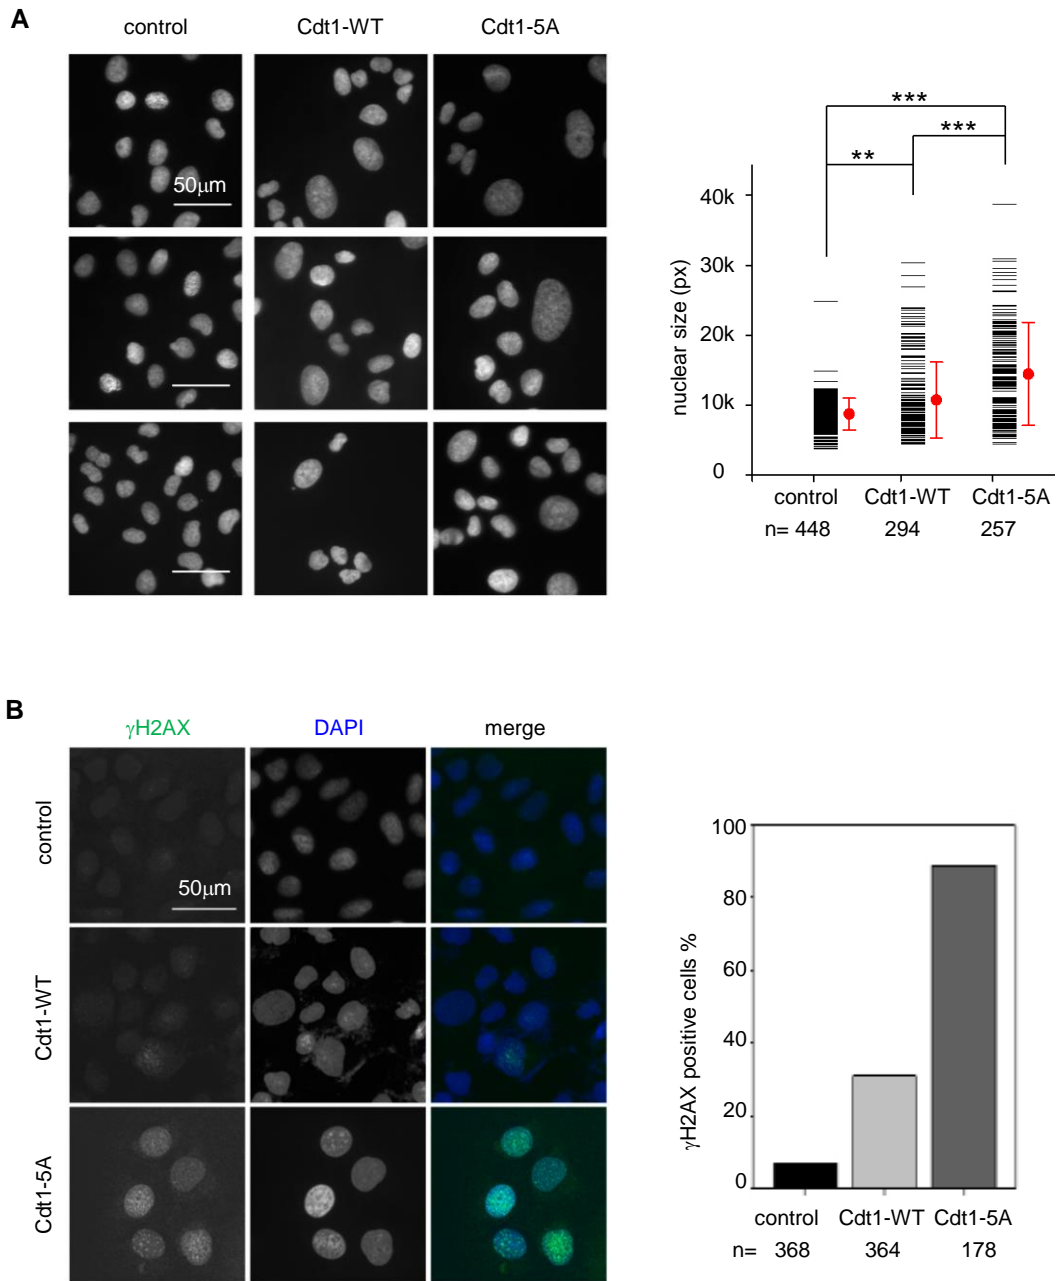

Supplement: pgen.1008988.s002.pdf [file pgen.1008988.s002.pdf]
