# Supplementary material for: Distinct and sequential re-replication barriers ensure precise genome duplication
Source: PLOS journal article supplement (doi:10.1371/journal.pgen.1008988), 2020-08-25

S3 Fig

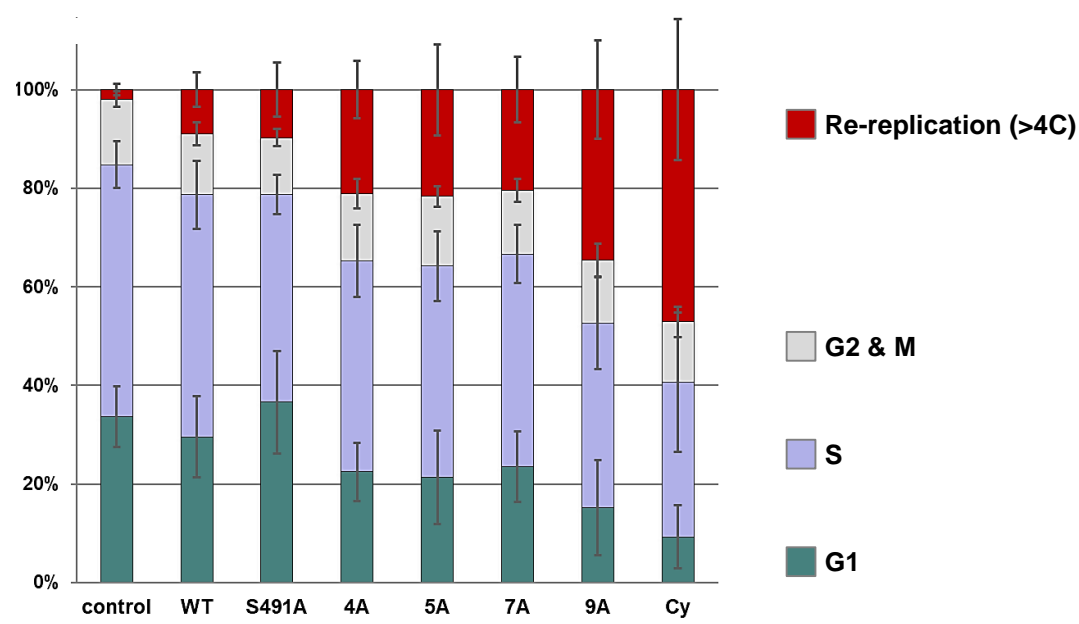

Supplement: S3 (10.1371/journal.pgen.1008988.s003) [file journal.pgen.1008988.s003]
